# Supplementary material for: Sociobehavioral, Biological and Health Characteristics of Riverside People in the Xingu Region, Pará, Brazil
Source: Preprints.org preprint supplement (doi:10.20944/preprints202301.0293.v1), 2023-01-17
Supplement: Supplementary file 2 [file supplementary]

| **Variáveis** | **Descrição** | **Quantidade Total** |
| --- | --- | --- |
| Sociodemográficas | - Leitura [1]  - Grau de escolaridade [1] | 2 |
| Biológicas | - Sexo [1], idade [1], etnia [1]  - BMI [1], WHR [1]  - Systolic Blood Pressure (SBP) [1]  - Diastolic Blood Pressure (DBP) [1]  - Glicemia [1]  - Perfil lipídico: TC, TG, HDL, LDL [4]  - Se tem doença: dislipidemia, stroke - CVA, CVD, SAH, DM [5] | 17 |
| Comportamentais | - Se fuma, é ex-fumante, tempo de tabagismo em anos e frequência diária [4],  - Se consome bebidas alcóolicas e frequência semanal [2],  - Frequência semanal de exercícios físicos [1],  - Se a alimentação é saudável [1],  - Consumo de peixe semanal [1] | 9 |
